1 Environmental drivers behind the genetic differentiation in mountain chickadees (*Poecile*  
2 *gambeli*)

3 Running title: Population genetics of mountain chickadees

4

5 Srikanthan P<sup>1</sup>, TM Burg

6

7 Department of Biology, 4401 University Dr, University of Lethbridge, Lethbridge, AB, T1K

8 3M4, Canada

9

10 **1 Corresponding author**

11 Email: Srikanthan P. prahaladsrikanthan@gmail.com

12 Current address of corresponding author: Department of Biological Engineering, Indian

13 Institute of Technology Madras, 600036 India

14

15

---

<sup>1</sup> Current address of corresponding author: Department of Biological Engineering, Indian  
Institute of Technology Madras, 600036 India

16 **Abstract**

17 Anthropogenic climate change has a large impact on wildlife populations and the scale of the  
18 impacts have been increasing. In this study, we utilised ddRAD sequence data to investigate  
19 genetic divergence and identify the environmental drivers of genetic differentiation between  
20 12 populations of mountain chickadees, family Paridae, sampled across North America. To  
21 delineate populations and identify potential zones of hybridisation, we conducted a  
22 discriminant analysis of principal components (DAPC), admixture analysis, and calculated  
23 pairwise  $F_{st}$  values. The DAPC revealed four clusters: southern California, eastern Rocky  
24 Mountains, northwestern Rocky Mountains and Oregon/northern California. We then used  
25 BayeScEnv to highlight significant outlier SNPs associated with the five environmental  
26 variables. We identified over 150 genes linked to outlier SNPs associated with more than 15  
27 pathways, including stress response and circadian rhythm. We also found a strong signal of  
28 isolation by distance. Local temperature was highly correlated with genetic distance. Maxent  
29 simulations showed a northward range shift over the next 50 years and a decrease in suitable  
30 habitat, highlighting the need for immediate conservation action.

31

32 **Keywords:** climate change; ddRAD; gene-environment interaction; *Poecile gambeli*;  
33 population genetics; species distribution models

34

35 **Introduction**

36 Anthropogenic climate change is increasingly affecting ecosystems worldwide. The steady  
37 increase in temperature means and variability can affect the functioning of organisms and  
38 alter ecosystems that have existed on this planet for millennia. While most ecosystems are  
39 sensitive to changes in the environment, mountain ecosystems are particularly vulnerable to  
40 environmental changes (Beniston, 2003). Owing to increasing temperatures and reduced snow  
41 cover, organisms in mountainous regions may shift their elevational range to higher altitudes,  
42 potentially leading to population fragmentation and extinction (Calkins et al., 2012; McDonald &  
43 Brown, 1992; Parmesan, 2006; Wilson et al., 2007). Climate change also significantly affects  
44 phenology, such as the timing of flowering or breeding (Walther et al., 2002). The extent and  
45 effects of these changes are a current area of study, and the pace at which changes occur  
46 requires commensurate efforts in the form of conservation research to prevent the breakdown  
47 of ecosystems and extinction of organisms (Christmann & Menor, 2021; Payne et al., 2020).

48

49 The North American landscape is full of physical barriers that affect species dispersal, and  
50 therefore causing genetic divergence (Antonelli, 2017; Boutilier et al., 2014; Machado et al.,  
51 2018). In addition, the wide range of environmental conditions across the continent makes it  
52 an ideal area to study the effect of the environment on genetic differentiation. In particular,  
53 species with low migration rates could experience significant divergence (Keyghobadi et al.,  
54 1999). Therefore, it is crucial to study the population genetics of these species to investigate  
55 their resilience to climate change (Hanski et al., 2006). Despite being able to traverse long  
56 distances, birds are unable to pass through certain barriers, makes them a good model for  
57 studying the effects of physical barriers on divergence (Greenwood & Harvey, 1982).

58

59 The mountain chickadee, *Poecile gambeli*, is found across western North America and  
60 primarily occupies coniferous forests. As many as seven subspecies have been described and  
61 are divided into two mtDNA groups, eastern and western, with limited contemporary gene  
62 flow observed between them (Hindley et al., 2018; Spellman et al., 2007). A recent study  
63 using microsatellite data identified Washington as a potential contact zone between two  
64 clades (Hindley et al., 2018). Ubiquitous across the west, the mountain chickadee has limited  
65 migratory capabilities, and high philopatry makes it an ideal candidate for studying the effects  
66 of geography and climate on genetic differentiation.

67

68 In this study, we examined the population structure of mountain chickadees from populations  
69 across the range using double digest restriction-site associated DNA, ddRAD, data. In  
70 addition, we aimed to answer the following questions: (1) What are the environmental drivers  
71 of genetic differentiation? Previous studies using mtDNA have shown that isolation by  
72 distance influences differentiation (Hindley et al., 2018); however, more information is  
73 needed on the effects of other variables such as temperature and precipitation. (2) Which  
74 genes or pathways are undergoing selection across populations? Given the pace of climate  
75 change, it is essential to investigate the pathways undergoing selection to identify gene-  
76 environment interactions. (3) How much will the changing climate affect the habitat of  
77 mountain chickadees over the next 50 years? Although we expect a northward shift in habitat  
78 or a shift in elevational range, understanding how a common species is affected by climate  
79 change can provide valuable insights to inform conservation decisions on other co-distributed  
80 species.

81

82 **Methods**

83 *Sampling and DNA extraction*

84 A total of 94 mountain chickadee samples were collected from 12 locations (Figure 1, Table  
85 1). Birds were caught using mist nets and either blood or feather samples were collected.  
86 Following Aljanabi et al. (1997), we used ~40 ul of blood to extract DNA from samples.  
87 Library preparation for ddRAD sequencing was done at the University of Laval using the  
88 enzymes *Pst*I, *Nsi*I, and *Msp*I and sequencing was done at Genome Quebec on an Illumina  
89 NovaSeq 6000 S4 PE100.

90

91 *Bioinformatic pipeline*

92 Sabre was used to demultiplex the ddRAD data. Adapters were removed and fastq files were  
93 trimmed to 80 bp using Cutadapt (Martin, 2011). The fastq files with the trimmed sequences  
94 were aligned to a black-capped chickadee reference genome provided by Scott Taylor  
95 (University of Colorado, Boulder) with BWA-MEM using default settings (Branch et al., 2022;  
96 Li & Durbin, 2009; Wagner et al., 2020). The resulting bam files were used to identify SNPs with  
97 gstacks. The gstacks output was used to create a vcf file and calculate summary statistics with  
98 populations using the default parameters while limiting the SNPs to one per locus (Catchen et  
99 al., 2013). SNPs were subsequently filtered using Vcftools to keep bi-allelic SNPs with a  
100 minor allele frequency  $\geq 0.05$  (Danecek et al., 2011). SNPs with  $> 50\%$  missing data and  
101 individuals with  $> 30\%$  missing data were excluded. The filtered vcf files contained 28,600  
102 sites and 61 individuals from 11 populations; no individuals from NM remained after  
103 filtering.

104

105 *Population analyses*

106 To analyse the population structure, we conducted a DAPC (discriminant analysis of principal  
107 components) in R using the packages ‘adeigenet’, ‘ape’, ‘vcfR’, and ‘ade4’ (Dray & Dufour,  
108 2007; Jombart, 2008; Knaus & Grünwald, 2016; Paradis & Schliep, 2018). DAPC accounts for both  
109 within- and between-group differences when clustering individuals. After clustering, we  
110 plotted the linear discriminants in 2d and 3d plots using the packages ‘ggplot2’ and ‘plotly’  
111 (Sievert, 2020; Wilkinson, 2011).

112

113 To identify the number of ancestral populations, we used ADMIXTURE with default settings  
114 iteratively for K=1-7 (Alexander et al., 2009). Linkage disequilibrium pruning and vcf-to-bed  
115 conversion were performed using PLINK (Purcell et al., 2007).

116

117 Pairwise Fst values between populations were calculated with Arlequin using the default  
118 settings (Excoffier & Lischer, 2010). Vcf-to-arp conversion was done using PGDSpider2 (Lischer  
119 & Excoffier, 2011).

120

### 121 *Outlier loci and environmental variation*

122 To identify the candidate loci under selection, we used BayeScan (Foll & Gaggiotti, 2008).  
123 BayeScan is a Bayesian algorithm based on the multinomial-Dirchlet model, which identifies  
124 loci under selection using differences in allele frequencies between populations. We set the  
125 pr\_odds value at 350, with a total of 1,00,000 iterations. The pr\_odds value defines the  
126 likelihood of the neutral model compared with the selection model.

127

128 To identify divergence associated with environmental variation, we used BayeScEnv for five  
129 environmental variables: temperature, precipitation, altitude, temperature seasonality and

130 precipitation seasonality (Villemereuil & Gaggiotti, 2015). BayeScEnv, which is based on the F-  
131 model, detects local adaptation linked to a given environmental variable using Bayesian  
132 methods. In this study, we set the pr\_jump value at 0.05 with a total of 50,000 runs. The  
133 pr\_jump value is similar to the pr\_odds value used in BayeScan. Using the ‘sp’ and ‘raster’  
134 packages, we extracted 30s resolution from <https://www.worldclim.org/> for the following  
135 environmental variables: Annual Mean Temperature (BIO1), Temperature Seasonality  
136 (stdev×100)(BIO4), Annual Precipitation (BIO11), Precipitation Seasonality (Coefficient of  
137 Variation) (BIO11), and Elevation from the SRTM data (Bivand et al., 2013; Fick & Hijmans,  
138 2017; Hijmans, 2020). The environmental data were standardised before the BayeScEnv  
139 analysis.

140

141 To test for isolation by distance and the effect of the above environmental variables on  
142 genetic differentiation, we conducted Mantel and partial Mantel tests using GenAlEx and the  
143 R package ‘vegan’ (Dixon, 2003; Mantel, 1967; Peakall & Smouse, 2012). Mantel tests are  
144 commonly used in population genetics to test for correlation between two matrices, while  
145 partial Mantel tests use a third matrix to account for another variable (Diniz-Filho et al.,  
146 2013).

147

#### 148 *Genes of interest*

149 We used the gff file for black-capped chickadees provided by Scott Taylor to identify genes  
150 under selection and investigate gene–environment interactions. We ran a custom R script to  
151 identify genes present within 100 kb of the outlier loci from the BayeScan/BayeScEnv  
152 analyses. Subsequently, to identify the pathways and functions associated with these genes,

153 we ran a gene ontology with ShinyGO using a human and zebra finch gene set. The genes  
154 were also analysed individually (Ge et al., 2019).

155

### 156 *Species distribution models*

157 To understand the distribution of the species in the past and future, we created species  
158 distribution models for the current distribution, the last glacial maxima, and four  
159 Representative Concentration Pathways (RCP) in 2050 and 2070. RCPs describe different  
160 climatic futures depending on the emission of greenhouse gases with the four main RCPs  
161 being RCP2.6, RCP4.5, RCP6, and RCP8.6 (van Vuuren et al., 2011).

162

163 We used the Maxent algorithm in the ‘Wallace’ package (Kass et al., 2018). This algorithm  
164 uses occurrence data in conjunction with environmental layers to provide a potential  
165 distribution for a species. Presence data were obtained from iNaturalist observations over a 13  
166 year period from 2010-2022 (GBIF.org, 2022) which we spatially thinned using a 10 km  
167 threshold. These points were then partitioned into six clusters using the random k-fold method  
168 (Aiello-Lammens et al., 2015). Using these 5330 points, we created a SDM with 14  
169 environmental variables.

170

171 We tested 12 models: linear (L), quadratic (Q), hinge (H), and linear-quadratic-hinge (LQH),  
172 with a regularization multiplier between 1-3 using a step value of 1. Model selection was done  
173 using AICc and AUC values (Kass et al., 2021; Phillips, 2017). The trained models were  
174 projected onto the LGM and RCP scenarios using environmental layers obtained from  
175 <http://www.paleoclim.org> and CCSM4, respectively using a 10% minimum training presence  
176 threshold (Brown et al., 2018; Hill, 2015; Karger et al., 2017; Piasias & Moore, 1981).



177

## 178 **Results**

### 179 *Population structure*

180 We looked at over 28,500 loci in 61 individuals from 11 populations after filtering. Prior to  
181 filtering, there were over 1,000,000 SNPs for 94 individuals from 12 populations. The DAPC,  
182 consistent with Hindley et al. (2018), revealed four distinct clusters: southern CA; northern  
183 CA/southern OR; eastern Rockies (MT, UT, SAB); and northwestern Rockies (WA, BCR,  
184 FTSJ, PG, NWBC) (Figure 2a). The first three linear discriminants (LD) explained 98.5% of  
185 the variance, while the fourth explained approximately 1.5%. Pairwise LD plots (Figure 2b)  
186 accounted for the effect of altitude on genetic differentiation.

187

188 As ADMIXTURE does not predict the K value, we ran the analysis for K=1-7 (Figure 3a-b).  
189 Figure 3(b) shows the CV errors for each K value, where K=1-3 are strongly supported (CV  
190 error 0.668-0.696). K=4-6 coincide with the DAPC despite having a slightly higher CV error  
191 (0.758-1.026). For K=4, the SCA population splits from the SOR/NCA population to form a  
192 separate cluster consistent with the DAPC analysis. At K=5 WA separates from the other  
193 northwestern Rocky populations and BCR individuals and three FTSJ individuals show  
194 admixture with WA.

195

196 The pairwise  $F_{st}$  values, consistent with the DAPC, showed four broad clusters, with the SCA  
197 population having the highest  $F_{st}$  values between every pair (Figure 4). The p-values were  
198 significant for most cases, except those that included NWBC, PG, or SAB populations.

199 Within the northwestern Rockies group, WA was significantly different from all of the other  
200 populations except PG. Pairwise  $F_{st}$  values ranged from 0.02 to 0.37, the highest significant

201 value is seen between BCR-SCA while the smallest are between the BCR-FTSJ and UT-MT  
202 populations.

203

#### 204 *Outlier loci and gene-environment analysis*

205 To identify areas of genomic divergence and their association with environmental factors, we  
206 used BayeScan and BayeScEnv, two commonly used genome scan programs (Foll & Gaggiotti,  
207 2008; Villemereuil & Gaggiotti, 2015). Outlier loci associated with temperature (Temp), altitude  
208 (Alt), precipitation seasonality (PS), temperature seasonality (TS), and precipitation (Prec)  
209 were identified using BayeScEnv, whereas BayeScan was used to identify all possible  
210 outliers, regardless of their association with environmental variables.

211

212 We identified 2251 outlier loci at a false discovery rate (FDR) of 0.0001 using BayeScan,  
213 despite using a conservative model with a pr\_odds value of 350 (Figure 5a). Several SNPs  
214 had a false discovery rate of 0, which was converted to  $10e^{-10}$  for visualisation. Similarly, the  
215 BayeScEnv analysis, with an FDR of 0.0001, showed 1564 outlier SNPs associated with  
216 temperature, 2060 with temperature seasonality, 805 with precipitation, 1090 with  
217 precipitation seasonality, and 1606 with altitude (Figure 5b-f). Several SNPs had a false  
218 discovery rate of 0, which was converted to  $10e^{-6}$  for visualisation. We used different values  
219 for visualisation between the BayeScan and BayeScEnv analysis due to several SNPs having  
220 FDRs of  $10e^{-6}$  in the former.

221

222 To test whether the large number of outlier loci was due to the isolated SCA population, we  
223 ran the same tests for pairs of the identified DAPC clusters and with all populations except for  
224 SCA. We found a significant decrease in the number of outlier loci identified in the pairwise

225 cluster tests. The decrease differed amongst clusters, but the number of outlier loci ranged  
226 from 4-800. In the case of precipitation, the outliers ranged from 30-500 compared to 805.  
227 However, there was no change when we repeated the analysis with every population  
228 excluding the SCA population.

229

230 We performed Mantel and partial Mantel tests to investigate the possibility of isolation by  
231 distance and the effect of the aforementioned environmental variables on divergence.  
232 Geographic distance ( $R_{xy} = 0.54$ ) was most highly correlated with genetic distance, followed  
233 by temperature ( $R_{xy} = 0.40$ ) (Figure 6a-b). All the results were statistically significant ( $p <$   
234  $0.0003$ ). The partial Mantel tests highlighted a similar pattern; however, when the z-axis was  
235 either temperature, temperature seasonality, or geographic distance; the results for  
236 precipitation seasonality did not meet the cut-off criterion of  $p = 0.05$ . In addition, the results  
237 of temperature seasonality when the z-axis was geographic distance did not meet the cut-off  
238 criteria.

239

#### 240 *Genes of interest*

241 We identified 181 genes within 100 kb of temperature-associated SNPs and 189 genes from  
242 the BayeScan outlier SNPs. Genes of interest were analysed only for these two cases because  
243 of the overlap in SNPs across environmental variables. ShinyGO identified 15 significant  
244 pathways (Supplementary, gene\_SuppInfo.xlsx) for the BayeScan genes, which included  
245 thermogenesis ( $p = 4.58e^{-5}$ ).

246 Subsequently, we grouped the genes based on their biological functions using ShinyGO (Ge  
247 et al., 2019). The BayeScan analysis revealed 37 genes associated with response to stress, 22  
248 genes related to immune system processes, and three genes associated with circadian rhythm.

249 CSNK1D, a clock gene, was one of the genes associated with circadian rhythm, which has  
250 been shown to play a role in migration (Steinmeyer et al., 2009). In addition, several genes  
251 affecting immune response, response to external stimuli, and growth were found to be  
252 associated with outlier SNPs. We also identified genes associated with the reproductive  
253 system in all the analyses. The JAM3 gene is known to play a role in spermatogenesis and the  
254 RNF212 gene has been shown to influence meiotic recombination. A similar grouping of  
255 genes was observed using the BayeScEnv temperature-associated SNPs, with the number of  
256 genes associated with each function differing.

257 We obtained similar results when using the zebra finch genome, although the number of  
258 unmapped genes was higher than that in the human genome (BayeScan – 137 vs 87  
259 unmapped, BayeScEnv – 108 vs 64 unmapped).

260

### 261 *Species distribution models*

262 We created species distribution models to understand the effects of climate change on  
263 mountain chickadee habitat (Figure 7). We ran 12 models with a regularisation multiplier  
264 between 1-3 with a step value of one. While all models had an AUC value of 0.93 or above,  
265 the hinge model with regularisation multiplier 1 was chosen as the best model based on AICc  
266 and AUC values.

267 The SDMs show a significant decrease in suitable habitat over the next five decades across all  
268 RCP scenarios except RCP2.6, which is an ideal projection of future climate. In addition, a  
269 northward shift in habitat is also observed. The SDM for the last glacial maximum is  
270 consistent with previous studies, with populations present near the coast and extending into

271 Mexico (Manthey et al., 2012) (Figure 7d). The SDMs for other RCPs, response curves, and  
272 model statistics are available in the supplementary material.

273

## 274 **Discussion**

275 In this study, apart from delineating population structure, we aimed to answer the following  
276 questions: (1) What are the environmental drivers of genetic differentiation? (2) Which genes  
277 or pathways are undergoing selection across populations? (3) How much will climate change  
278 affect the habitat of mountain chickadees over the next 50 years?

279

280 DAPC revealed four primary clusters, which coincided with our ADMIXTURE and pairwise  
281  $F_{st}$  values. The eastern Rocky Mountain cluster (UT, MT, SAB) is separated from the  
282 northwestern Rocky Mountain populations by the Rocky Mountains. These populations could  
283 have diverged because of the presence of physical barriers or differences in habitat on either  
284 side of the mountains. This is evident from the high, but not significant, pairwise  $F_{st}$  values  
285 between the BCR and SAB populations, which are geographically close (300 km), but  
286 separated by the Rockies. In addition, the SCA population is of particular interest because it is  
287 genetically isolated from all other populations. As indicated by the Mantel tests and previous  
288 studies, this could be due to its distance from other populations or due to  
289 geographic/environmental features within its habitat (Spellman et al., 2007; Hindley et al.,  
290 2018).

291

292 Our outlier SNP analysis revealed several loci under selection associated with environmental  
293 conditions. Despite the use of conservative models, we identified several outlier loci

294 highlighting the genetic diversity of the species. However, because the large number of loci  
295 could have been due to the isolated SCA population, we conducted the same analyses by (1)  
296 excluding the SCA population and (2) between the DAPC clusters. There were no significant  
297 differences in the first case, whereas we observed a decrease in the second case. This decrease  
298 can be attributed to the low genetic distances between populations within the same cluster.  
299 Additionally, the overlap of SNPs across analyses and the existence of several SNPs with an  
300 FDR of zero highlights the genetic diversity present in the species. Divergence across  
301 populations is expected because of the reduced gene flow among them due to the non-  
302 migratory nature of the species (Templeton, 2006; Eckert et al., 2008; McCallum et al., 2020).

303

304 Consistent with mtDNA and microsatellite studies, genetic diversity is highly influenced by  
305 geographic distance (Hindley et al., 2018). The strong correlation between geographic and  
306 genetic distance ( $R_{xy} = 0.55$ ) indicates isolation by distance. However, we cannot discount the  
307 role of habitat differences, given that local temperature ( $R_{xy} = 0.4$ ), temperature seasonality  
308 ( $R_{xy} = 0.23$ ), and altitude ( $R_{xy} = 0.2$ ) are also significantly correlated with genetic distance.  
309 The rapid increase in global temperatures could affect the genetic isolation in the coming  
310 years. Additionally, an increase in temperature forces species to shift their elevational range.  
311 Precipitation and precipitation seasonality are predicted to increase with rising temperatures,  
312 resulting in more extreme climate scenarios (Boer, 2009; Pendergrass et al., 2017). As a  
313 result, despite their weak correlation with divergence, these factors could play a major role in  
314 the future of these species.

315

316 We identified genes associated with SNPs undergoing selection. Over 30 genes linked to  
317 stress response were found to be near with SNPs associated with temperature. We also found

318 over 19 genes linked to response to external stimuli, and ShinyGO analysis revealed that the  
319 thermogenesis pathway had a significant number of genes involved. Previous studies have  
320 shown that increasing temperatures are linked to the activation of the stress response in birds  
321 in the form of thermoregulatory strategies such as panting and increased glucocorticoid levels  
322 (Bohler et al., 2021; Montesana & Hau, 2022; Siegel, 1980). This is of particular concern because  
323 of rising global temperatures, which could lead to negative consequences for the species. In  
324 addition, the selection of a clock gene, *CSNK1D*, could imply a change in phenology in  
325 response to rising temperatures (Milligan et al., 2009).

326

327 We observed a northward shift in suitable habitat over the next five decades with the SDM.  
328 This pattern was observed for all RCP scenarios, except for RCP2.6. However, RCP2.6 is an  
329 ideal scenario where all expected climate change goals are fulfilled, and temperatures increase  
330 by 1°C above pre-industrial levels by the year 2050 and remain the same in 2070 (van Vuuren  
331 et al., 2011). While shifting to cooler habitats is a normal thermoregulatory response, the  
332 massive decrease in suitable habitats for such a common species is worrying (Siegel, 1980).  
333 Additionally, because the model does not account for other factors, such as human-induced  
334 habitat loss, competition, and invasion; the amount of suitable habitat could be much less than  
335 predicted. This could lead to a further population decline in this species.

336

### 337 **Conclusions**

338 Mountain chickadee genetic distance is highly correlated with geographical distance and  
339 temperature. Genes affecting several essential functions associated with outlier SNPs were  
340 identified, highlighting the genetic diversity and selection pressure faced by the species. The

341 identification of genes related to circadian rhythm may underlie changes in phenology. In  
342 addition, the large decrease in suitable habitat over the next five decades for a common  
343 species highlights the need for immediate action to protect this species and other species from  
344 extinction.

345

#### 346 **Acknowledgements**

347 We thank NSERC Discovery Grant, Alberta Innovates and Mitacs for funding and Burke  
348 Museum of Natural History, University of Michigan Museum of Natural History, University  
349 of California, Berkeley Museum of Vertebrate Zoology, Louisiana State University Museum  
350 of Natural Science, and Smithsonian Museum of Natural Science for providing some of the  
351 samples used in this study. Samples were also collected by members of the Burg Lab at the  
352 University of Lethbridge including John Hindley, Brendan Graham, Linda Lait, Paulo  
353 Pulgarin, Kim Dohms and numerous field assistants. We also thank the National Park  
354 Service, USFWS, Parks Canada and Canada Wildlife Service for their assistance.



355 **Literature cited**

356

357 Adams, R. V., & Burg, T. M. (2015). Influence of ecological and geological features on  
358 rangewide patterns of genetic structure in a widespread passerine. *Heredity*, *114*(2), 143–  
359 154. <https://doi.org/10.1038/hdy.2014.64>

360 Aiello-Lammens, M. E., Boria, R. A., Radosavljevic, A., Vilela, B., & Anderson, R. P.  
361 (2015). spThin: an R package for spatial thinning of species occurrence records for use  
362 in ecological niche models. *Ecography*, *38*(5), 541–545.  
363 <https://doi.org/10.1111/ecog.01132>

364 Alan R. Templeton. (2006). Gene Flow and Population Subdivision. In *Population Genetics*  
365 *and Microevolutionary Theory* (pp. 169–236). Wiley.  
366 <https://doi.org/10.1002/9781119836070.ch6>

367 Alexander, D. H., Novembre, J., & Lange, K. (2009). Fast model-based estimation of ancestry  
368 in unrelated individuals. *Genome Research*, *19*(9), 1655–1664.  
369 <https://doi.org/10.1101/gr.094052.109>

370 Antonelli, A. (2017). Biogeography: Drivers of bioregionalization. *Nature Ecology &*  
371 *Evolution*, *1*(4), 0114. <https://doi.org/10.1038/s41559-017-0114>

372 Beniston, M. (2003). Climatic change in mountain regions: A review of possible impacts. In  
373 *Advances in Global Change Research* (pp. 5–31). Springer Netherlands.  
374 [https://doi.org/10.1007/978-94-015-1252-7\\_2](https://doi.org/10.1007/978-94-015-1252-7_2)

375 Bivand, R. S., Pebesma, E., & Gómez-Rubio, V. (2013). Classes for spatial data in R. In  
376 *Applied Spatial Data Analysis with R* (pp. 21–57). Springer New York.  
377 [https://doi.org/10.1007/978-1-4614-7618-4\\_2](https://doi.org/10.1007/978-1-4614-7618-4_2)

378 Boer, G. J. (2009). Changes in interannual variability and decadal potential predictability  
379 under global warming. *Journal of Climate*, *22*(11), 3098–3109.  
380 <https://doi.org/10.1175/2008JCLI2835.1>

381 Bohler, M. W., Chowdhury, V. S., Cline, M. A., & Gilbert, E. R. (2021). Heat stress  
382 responses in birds: A review of the neural components. *Biology*, *10*(11), 1095.  
383 <https://doi.org/10.3390/biology10111095>

384 Boutilier, S. T., Taylor, S. A., Morris-Pocock, J. A., Lavoie, R. A., & Friesen, V. L. (2014).  
385 Evidence for genetic differentiation among Caspian tern (*Hydroprogne caspia*)  
386 populations in North America. *Conservation Genetics*, *15*(2), 275–281.  
387 <https://doi.org/10.1007/s10592-013-0536-1>

388 Brown, J. L., Hill, D. J., Dolan, A. M., Carnaval, A. C., & Haywood, A. M. (2018).  
389 PaleoClim, high spatial resolution paleoclimate surfaces for global land areas. *Scientific*  
390 *Data*, *5*(1), 180254. <https://doi.org/10.1038/sdata.2018.254>

391 Calkins, M. T., Beever, E. A., Boykin, K. G., Frey, J. K., & Andersen, M. C. (2012). Not-so-  
392 splendid isolation: Modeling climate-mediated range collapse of a montane mammal  
393 *Ochotona princeps* across numerous ecoregions. *Ecography*, *35*(9), 780–791.  
394 <https://doi.org/10.1111/j.1600-0587.2011.07227.x>

- 395 Catchen, J., Hohenlohe, P. A., Bassham, S., Amores, A., & Cresko, W. A. (2013). Stacks: An  
396 analysis tool set for population genomics. *Molecular Ecology*, 22(11), 3124–3140.  
397 <https://doi.org/10.1111/mec.12354>
- 398 Christmann, T., & Menor, I. O. (2021). A synthesis and future research directions for tropical  
399 mountain ecosystem restoration. *Scientific Reports*, 11(1), 23948.  
400 <https://doi.org/10.1038/s41598-021-03205-y>
- 401 Danecek, P., Auton, A., Abecasis, G., Albers, C. A., Banks, E., DePristo, M. A., Handsaker,  
402 R. E., Lunter, G., Marth, G. T., Sherry, S. T., McVean, G., & Durbin, R. (2011). The  
403 variant call format and VCFtools. *Bioinformatics*, 27(15), 2156–2158.  
404 <https://doi.org/10.1093/bioinformatics/btr330>
- 405 Diniz-Filho, J. A. F., Soares, T. N., Lima, J. S., Dobrovolski, R., Landeiro, V. L., Telles, M.  
406 P. de C., Rangel, T. F., & Bini, L. M. (2013). Mantel test in population genetics.  
407 *Genetics and Molecular Biology*, 36(4), 475–485. <https://doi.org/10.1590/s1415-47572013000400002>
- 409 Dixon, P. (2003). VEGAN, a package of R functions for community ecology. *Journal of*  
410 *Vegetation Science*, 14(6), 927–930. <https://doi.org/10.1111/j.1654-1103.2003.tb02228.x>
- 411 Dray, S., & Dufour, A.-B. (2007). Theade4Package: Implementing the duality diagram for  
412 ecologists. *Journal of Statistical Software*, 22(4). <https://doi.org/10.18637/jss.v022.i04>
- 413 Eckert, C. G., Samis, K. E., & Loughheed, S. C. (2008). Genetic variation across species'  
414 geographical ranges: the central–marginal hypothesis and beyond. *Molecular Ecology*,  
415 17(5), 1170–1188. <https://doi.org/10.1111/j.1365-294X.2007.03659.x>
- 416 Excoffier, L., & Lischer, H. E. L. (2010). Arlequin suite ver 3.5: A new series of programs to  
417 perform population genetics analyses under Linux and Windows. *Molecular Ecology*  
418 *Resources*, 10(3), 564–567. <https://doi.org/10.1111/j.1755-0998.2010.02847.x>
- 419 Fick, S. E., & Hijmans, R. J. (2017). WorldClim 2: New 1 km spatial resolution climate  
420 surfaces for global land areas. *International Journal of Climatology*, 37(12), 4302–4315.  
421 <https://doi.org/10.1002/joc.5086>
- 422 Foll, M., & Gaggiotti, O. (2008). A genome-scan method to identify selected loci appropriate  
423 for both dominant and codominant markers: A Bayesian perspective. *Genetics*, 180(2),  
424 977–993. <https://doi.org/10.1534/genetics.108.092221>
- 425 GBIF.org. (2022). *GBIF Download*. <https://doi.org/10.15468/dl.tgh2v7>
- 426 Ge, S. X., Jung, D., & Yao, R. (2019). ShinyGO: A graphical gene-set enrichment tool for  
427 animals and plants. *Bioinformatics*, 36(8), 2628–2629.  
428 <https://doi.org/10.1093/bioinformatics/btz931>
- 429 Greenwood, P. J., & Harvey, P. H. (1982). The natal and breeding dispersal of birds. *Annual*  
430 *Review of Ecology and Systematics*, 13(1), 1–21.  
431 <https://doi.org/10.1146/annurev.es.13.110182.000245>
- 432 Hanski, I., Saastamoinen, M., & Ovaskainen, O. (2006). Dispersal-related life-history trade-  
433 offs in a butterfly metapopulation. *Journal of Animal Ecology*, 75(1), 91–100.  
434 <https://doi.org/10.1111/j.1365-2656.2005.01024.x>

- 435 Hijmans, R. J. (2020). raster: Geographic analysis and modeling with raster data. *R Package*  
436 *Version 3.1-5*, 3.1(5).
- 437 Hill, D. J. (2015). The non-analogue nature of Pliocene temperature gradients. *Earth and*  
438 *Planetary Science Letters*, 425, 232–241. <https://doi.org/10.1016/j.epsl.2015.05.044>
- 439 Hindley, J. A., Graham, B. A., Pulgarin-R., P. C., & Burg, T. M. (2018). The influence of  
440 latitude, geographic distance, and habitat discontinuities on genetic variation in a high  
441 latitude montane species. *Scientific Reports*, 8(1), 11846 [https://doi.org/10.1038/s41598-](https://doi.org/10.1038/s41598-018-29982-7)  
442 018-29982-7
- 443 IUCN Red List. (n.d.). *IUCN. 2022. The IUCN Red List of Threatened Species. Version 2022-*  
444 *2*. <https://www.iucnredlist.org>. Accessed on 28 December 2022.
- 445 Jombart, T. (2008). adegenet: A R package for the multivariate analysis of genetic markers.  
446 *Bioinformatics*, 24(11), 1403–1405. <https://doi.org/10.1093/bioinformatics/btn129>
- 447 Karger, D. N., Conrad, O., Böhrner, J., Kawohl, T., Kreft, H., Soria-Auza, R. W.,  
448 Zimmermann, N. E., Linder, H. P., & Kessler, M. (2017). Climatologies at high  
449 resolution for the earth’s land surface areas. *Scientific Data*, 4(1), 170122.  
450 <https://doi.org/10.1038/sdata.2017.122>
- 451 Kass, J. M., Muscarella, R., Galante, P. J., Bohl, C. L., Pinilla-Buitrago, G. E., Boria, R. A.,  
452 Soley-Guardia, M., & Anderson, R. P. (2021). ENMeval 2.0: Redesign for  
453 customizable and reproducible modeling of species’ niches and distributions. *Methods in*  
454 *Ecology and Evolution*, 12(9), 1602–1608. <https://doi.org/10.1111/2041-210X.13628>
- 455 Kass, J. M., Vilela, B., Aiello-Lammens, M. E., Muscarella, R., Merow, C., & Anderson, R.  
456 P. (2018). Wallace: A flexible platform for reproducible modeling of species niches and  
457 distributions built for community expansion. *Methods in Ecology and Evolution*, 9(4),  
458 1151–1156. <https://doi.org/10.1111/2041-210X.12945>
- 459 Keyghobadi, N., Roland, J., & Strobeck, C. (1999). Influence of landscape on the population  
460 genetic structure of the alpine butterfly *Parnassius smintheus* (Papilionidae). *Molecular*  
461 *Ecology*, 8(9), 1481–1495. <https://doi.org/10.1046/j.1365-294x.1999.00726.x>
- 462 Knaus, B. J., & Grünwald, N. J. (2016). vcfr: A package to manipulate and visualize variant  
463 call format data in R. *Molecular Ecology Resources*, 17(1), 44–53.  
464 <https://doi.org/10.1111/1755-0998.12549>
- 465 Li, H., & Durbin, R. (2009). Fast and accurate short read alignment with Burrows-Wheeler  
466 transform. *Bioinformatics*, 25(14), 1754–1760.  
467 <https://doi.org/10.1093/bioinformatics/btp324>
- 468 Lischer, H. E. L., & Excoffier, L. (2011). PGDSpider: An automated data conversion tool for  
469 connecting population genetics and genomics programs. *Bioinformatics*, 28(2), 298–299.  
470 <https://doi.org/10.1093/bioinformatics/btr642>
- 471 Machado, A. P., Clément, L., Uva, V., Goudet, J., & Roulin, A. (2018). The Rocky  
472 Mountains as a dispersal barrier between barn owl (*Tyto alba*) populations in North  
473 America. *Journal of Biogeography*, 45(6), 1288–1300. <https://doi.org/10.1111/jbi.13219>
- 474 Mantel, N. (1967). The detection of disease clustering and a generalized regression approach.  
475 *Cancer Res*, 27(2), 209–220.

- 476 Manthey, J. D., Klicka, J., & Spellman, G. M. (2012). Is gene flow promoting the reversal of  
477 Pleistocene divergence in the mountain chickadee (*Poecile gambeli*)? *PLoS ONE*, 7(11),  
478 e49218. <https://doi.org/10.1371/journal.pone.0049218>
- 479 Martin, M. (2011). Cutadapt removes adapter sequences from high-throughput sequencing  
480 reads. *EMBnet.Journal*, 17(1), 10. <https://doi.org/10.14806/ej.17.1.200>
- 481 McCallum, D. A., Grundel, R., & Dahlsten, D. L. (2020). Mountain Chickadee (*Poecile*  
482 *gambeli*). In *Birds of the World*. Cornell Lab of Ornithology.  
483 <https://doi.org/10.2173/bow.mouchi.01>
- 484 McDonald, K. A., & Brown, J. H. (1992). Using montane mammals to model extinctions due  
485 to global change. *Conservation Biology*, 6(3), 409–415. <https://doi.org/10.1046/j.1523-1739.1992.06030409.x>
- 487 Mentenana, L., & Hau, M. (2022). Glucocorticoids in a warming world: Do they help birds to  
488 cope with high environmental temperatures? *Hormones and Behavior*, 142, 105178.  
489 <https://doi.org/10.1016/j.yhbeh.2022.105178>
- 490 Milligan, S. R., Holt, W. V., & Lloyd, R. (2009). Impacts of climate change and  
491 environmental factors on reproduction and development in wildlife. *Philosophical*  
492 *Transactions of the Royal Society B: Biological Sciences*, 364(1534), 3313–3319.  
493 <https://doi.org/10.1098/rstb.2009.0175>
- 494 Paradis, E., & Schliep, K. (2018). ape 5.0: An environment for modern phylogenetics and  
495 evolutionary analyses in R. *Bioinformatics*, 35(3), 526–528.  
496 <https://doi.org/10.1093/bioinformatics/bty633>
- 497 Parmesan, C. (2006). Ecological and evolutionary responses to recent climate change. *Annual*  
498 *Review of Ecology, Evolution, and Systematics*, 37(1), 637–669.  
499 <https://doi.org/10.1146/annurev.ecolsys.37.091305.110100>
- 500 Payne, D., Spehn, E. M., Prescott, G. W., Geschke, J., Snethlage, M. A., & Fischer, M.  
501 (2020). Mountain biodiversity is central to sustainable development in mountains and  
502 beyond. *One Earth*, 3(5), 530–533. <https://doi.org/10.1016/j.oneear.2020.10.013>
- 503 Peakall, R., & Smouse, P. E. (2012). GenAIEx 6.5: Genetic analysis in Excel. Population  
504 genetic software for teaching and research--an update. *Bioinformatics*, 28(19), 2537–  
505 2539. <https://doi.org/10.1093/bioinformatics/bts460>
- 506 Pendergrass, A. G., Knutti, R., Lehner, F., Deser, C., & Sanderson, B. M. (2017).  
507 Precipitation variability increases in a warmer climate. *Scientific Reports*, 7(1), 17966.  
508 <https://doi.org/10.1038/s41598-017-17966-y>
- 509 Phillips, S. (2017). Maxnet: Fitting ‘Maxent’ Species Distribution Models with “glmnet.” *R*  
510 *Package*.
- 511 Pisiias, N. G., & Moore, T. C. (1981). The evolution of Pleistocene climate: A time series  
512 approach. *Earth and Planetary Science Letters*, 52(2), 450–458.  
513 [https://doi.org/10.1016/0012-821X\(81\)90197-7](https://doi.org/10.1016/0012-821X(81)90197-7)
- 514 Purcell, S., Neale, B., Todd-Brown, K., Thomas, L., Ferreira, M. A. R., Bender, D., Maller, J.,  
515 Sklar, P., de Bakker, P. I. W., Daly, M. J., & Sham, P. C. (2007). PLINK: A tool set for

- 516 whole-genome association and population-based linkage analyses. *The American*  
517 *Journal of Human Genetics*, 81(3), 559–575. <https://doi.org/10.1086/519795>
- 518 Siegel, H. S. (1980). Physiological stress in birds. *BioScience*, 30(8), 529–534.  
519 <https://doi.org/10.2307/1307973>
- 520 Sievert, C. (2020). *Interactive Web-Based Data Visualization with R, plotly, and shiny*.  
521 Chapman and Hall/CRC. <https://doi.org/10.1201/9780429447273>
- 522 Spellman, G. M., Riddle, B., & Klicka, J. (2007). Phylogeography of the mountain chickadee  
523 (*Poecile gambeli*): Diversification, introgression, and expansion in response to  
524 Quaternary climate change. *Molecular Ecology*, 16(5), 1055–1068.  
525 <https://doi.org/10.1111/j.1365-294x.2007.03199.x>
- 526 Steinmeyer, C., Mueller, J. C., & Kempnaers, B. (2009). Search for informative  
527 polymorphisms in candidate genes: clock genes and circadian behaviour in blue tits.  
528 *Genetica*, 136(1), 109–117. <https://doi.org/10.1007/s10709-008-9318-y>
- 529 van Vuuren, D. P., Edmonds, J., Kainuma, M., Riahi, K., Thomson, A., Hibbard, K., Hurtt, G.  
530 C., Kram, T., Krey, V., Lamarque, J.-F., Masui, T., Meinshausen, M., Nakicenovic, N.,  
531 Smith, S. J., & Rose, S. K. (2011). The representative concentration pathways: an  
532 overview. *Climatic Change*, 109(1–2), 5–31. <https://doi.org/10.1007/s10584-011-0148-z>
- 533 Villemereuil, P., & Gaggiotti, O. E. (2015). A new FST-based method to uncover local  
534 adaptation using environmental variables. *Methods in Ecology and Evolution*, 6(11),  
535 1248–1258. <https://doi.org/10.1111/2041-210x.12418>
- 536 Walther, G-R., Post, E., Convey, P., Menzel, A., Parmesan, C., Beebee, T. J. C., Fromentin, J-  
537 M., Hoegh-Guldberg, O., & Bairlein, F. (2002). Ecological responses to recent climate  
538 change. *Nature*, 416(6879), 389–395. <https://doi.org/10.1038/416389a>
- 539 Wilkinson, L. (2011). ggplot2: Elegant graphics for data analysis by Wickham, H. *Biometrics*,  
540 67(2), 678–679. <https://doi.org/10.1111/j.1541-0420.2011.01616.x>
- 541 Wilson, R. J., Gutiérrez, D., Gutiérrez, J., & Monserrat, V. J. (2007). An elevational shift in  
542 butterfly species richness and composition accompanying recent climate change. *Global*  
543 *Change Biology*, 13(9), 1873–1887. <https://doi.org/10.1111/j.1365-2486.2007.01418.x>

544

## 545 **Data accessibility and benefit sharing**

546 *Data accessibility*

547 Multiplexed ddRAD sequence data will be uploaded to a data repository prior to publication.

548

549

550 *Benefit sharing*

551 A research collaboration was developed between researchers from India and Canada with  
552 funding from Mitacs. Our research also addresses a priority concern, climate change, and  
553 provides benefits by the sharing of our data and results on public databases.

554 **Author contributions**

555 The authors confirm contribution to the paper as follows: Study conception and design:  
556 Srikanthan and Burg. Data collection: Burg. Data analyses: Srikanthan. Wrote the paper:  
557 Srikanthan and Burg. All authors reviewed the results and approved the final version of the  
558 manuscript.

559

560 **Tables**

561 Table 1 List of sampling sites and sample sizes for mountain chickadees used in this study.

562 See Fig 1 for location.

| Location                   | Abbreviation | Sample size |
|----------------------------|--------------|-------------|
| Revelstoke, BC             | BCR          | 4           |
| Fort St James, BC          | FTSJ         | 8           |
| Northwest British Columbia | NWBC         | 2           |
| Prince George, BC          | PG           | 2           |
| Washington                 | WA           | 8           |
| Montana                    | MT           | 7           |
| Utah                       | UT           | 10          |
| Southern Alberta           | SAB          | 2           |
| Southern Oregon            | SOR          | 10          |
| Northern California        | NCA          | 5           |
| Southern California        | SCA          | 3           |

563

564 **Figure Legends:**

565 Figure 1 Mountain chickadee sampling sites in western North America along with the range  
566 map from the IUCN Red List (pink)

567 Figure 2 (a) 3d DAPC plot showing four distinct clusters (b) LD1 vs LD2 (c) LD1 vs LD3 (d)  
568 LD1 vs LD4

569  
570 Figure 3 (a) Admixture plot for K=2-7 (b) Cross validation errors for K=1-7

571  
572 Figure 4 Pairwise Fst values for 11 populations. Asterisks indicate non-significant  
573 observations (p-values >0.05).

574 Figure 5 BayeScan and BayScEnv plots with correlation q-values for genetic divergence  
575 where q-value = -log(FDR). (a) BayeScan plot (N=2251, FDR=0.001). (b) BayScEnv  
576 Temperature plot (N=1564, FDR=10<sup>-4</sup>). (c) BayScEnv Temperature Seasonality plot  
577 (N=2060, FDR=10<sup>-4</sup>). (d) BayScEnv Precipitation plot (N=805, FDR=10<sup>-4</sup>). (e) BayScEnv  
578 Precipitation Seasonality plot (N=1090, FDR=10e<sup>-4</sup>). (f) BayScEnv altitude plot (N=1606,  
579 FDR=10e<sup>-4</sup>).

580

581 Figure 6 (a) Mantel test R<sub>xy</sub> and p-values. Geographic distance-Dist, Precipitation-Prec,  
582 Precipitation seasonality-PS, Temp -Temperature, Temperature Seasonality-TS, Altitude-Alt  
583 (b) Geographic vs genetic distance plot.

584

585 Figure 7 Species distribution models of mountain chickadees using the 10<sup>th</sup> percentile training  
586 presence threshold. Legend: green-presence, brown-absence (a) Current distribution. (b) 2050  
587 distribution under RCP 8.5 (c) 2070 distribution under RCP 8.5. (d) Distribution during the  
588 last glacial maxima 21 kya.

**Figures:**

Figure 1

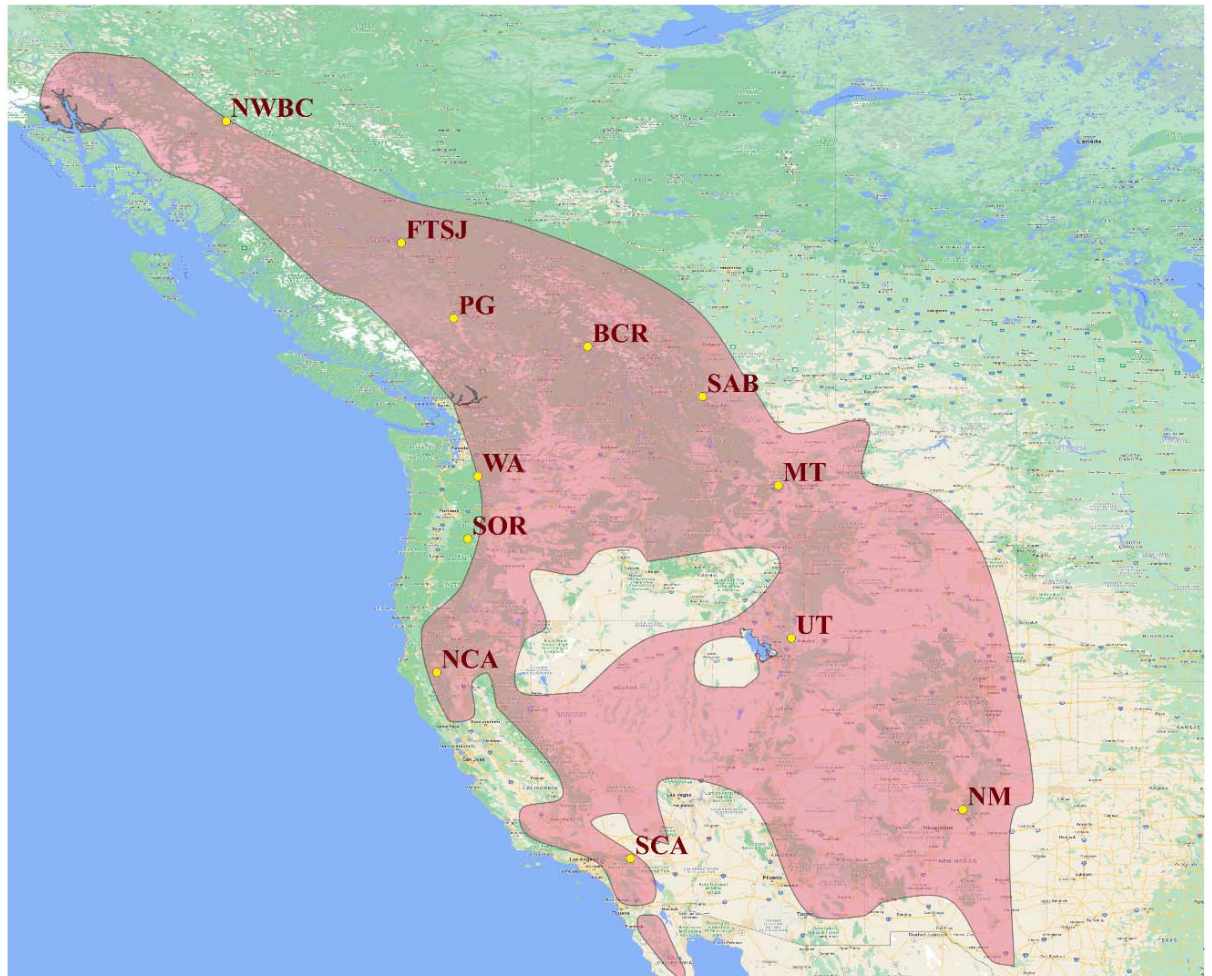



Figur

re 2

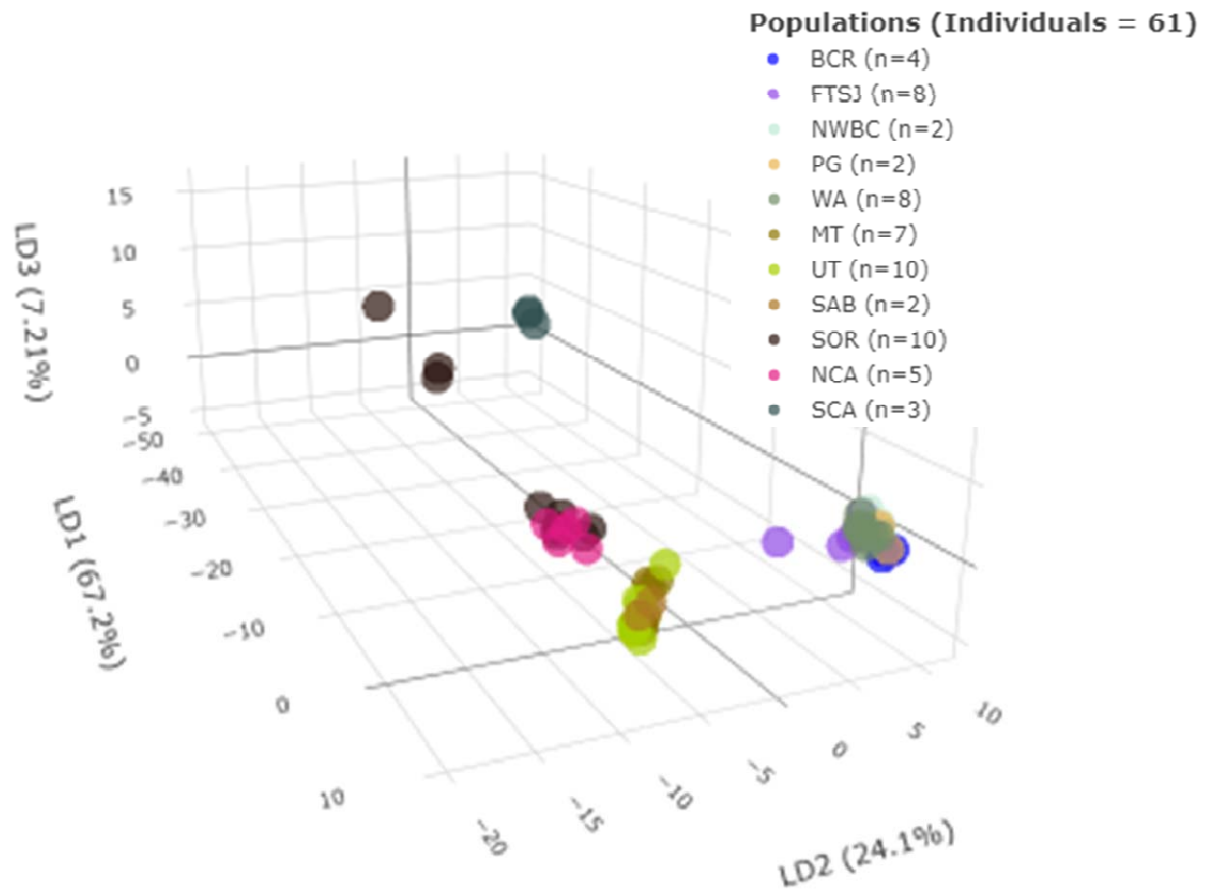

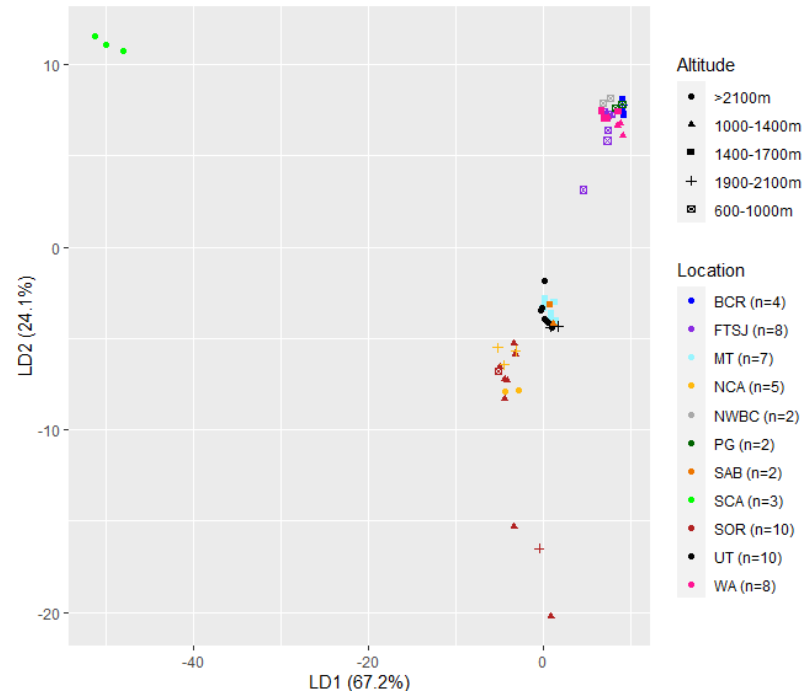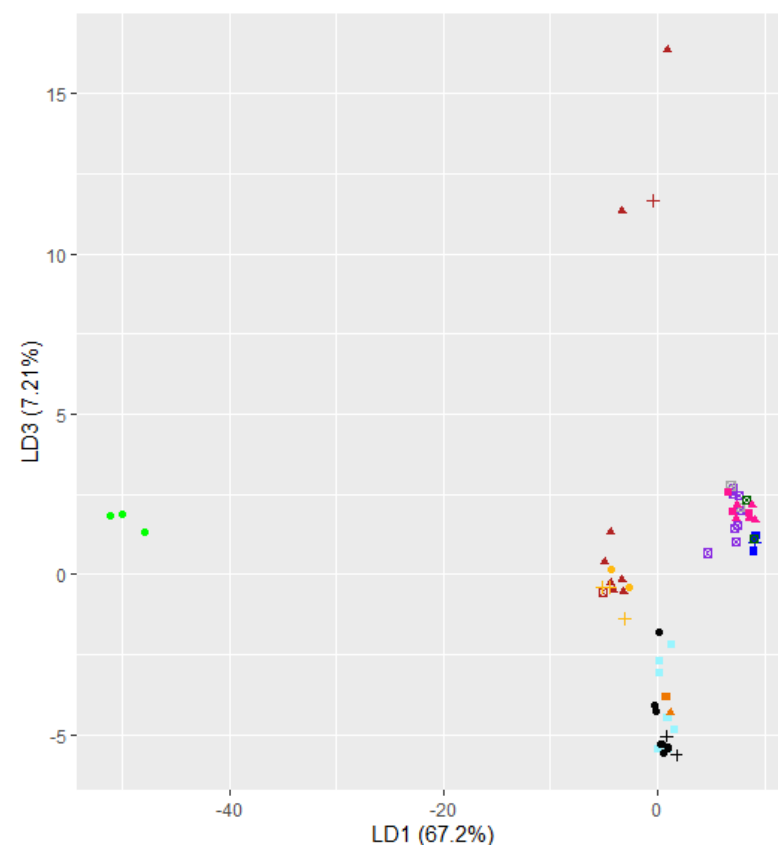

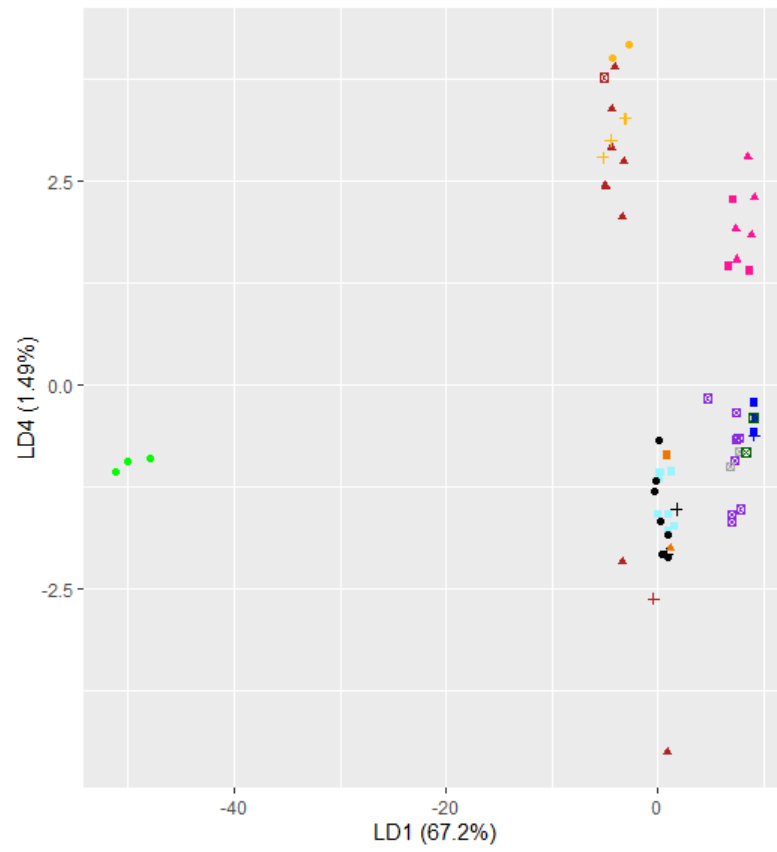

Figure 3

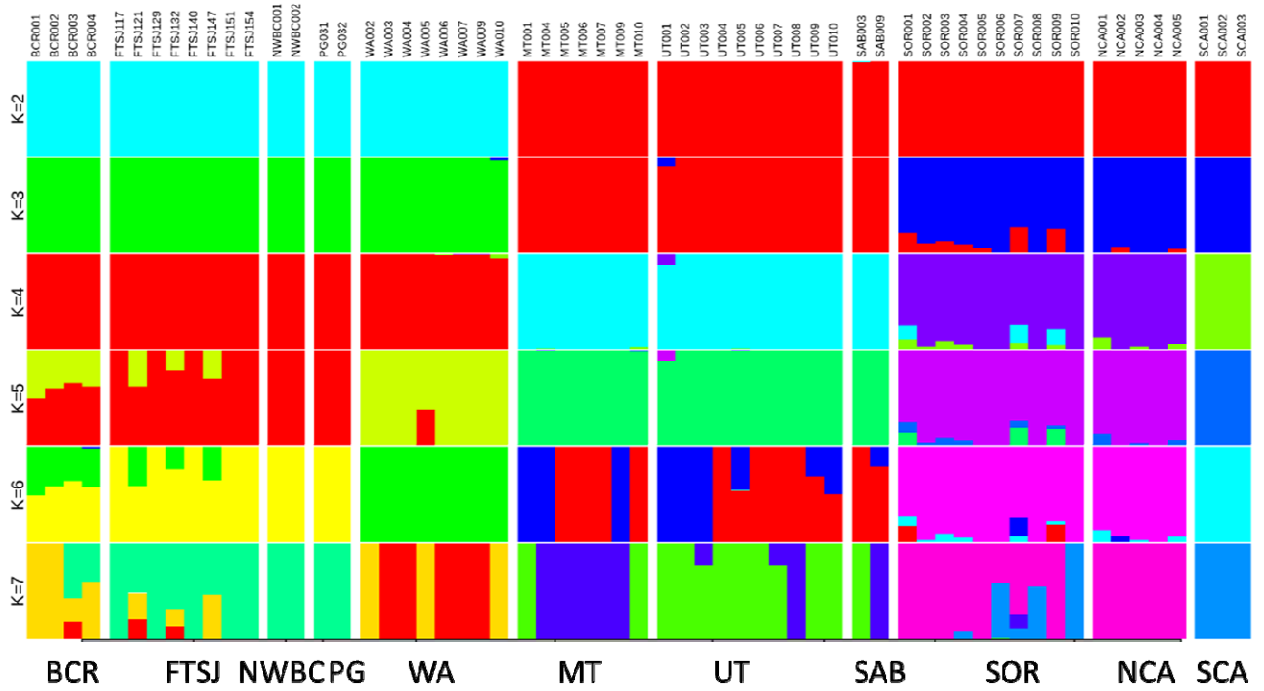



| <b>Number of<br/>ancestral<br/>populations (K)</b> | <b>CV<br/>error</b> |
|----------------------------------------------------|---------------------|
| 1                                                  | 0.668               |
| 2                                                  | 0.672               |
| 3                                                  | 0.696               |
| 4                                                  | 0.758               |
| 5                                                  | 0.830               |
| 6                                                  | 0.941               |
| 7                                                  | 1.026               |



Figure 5

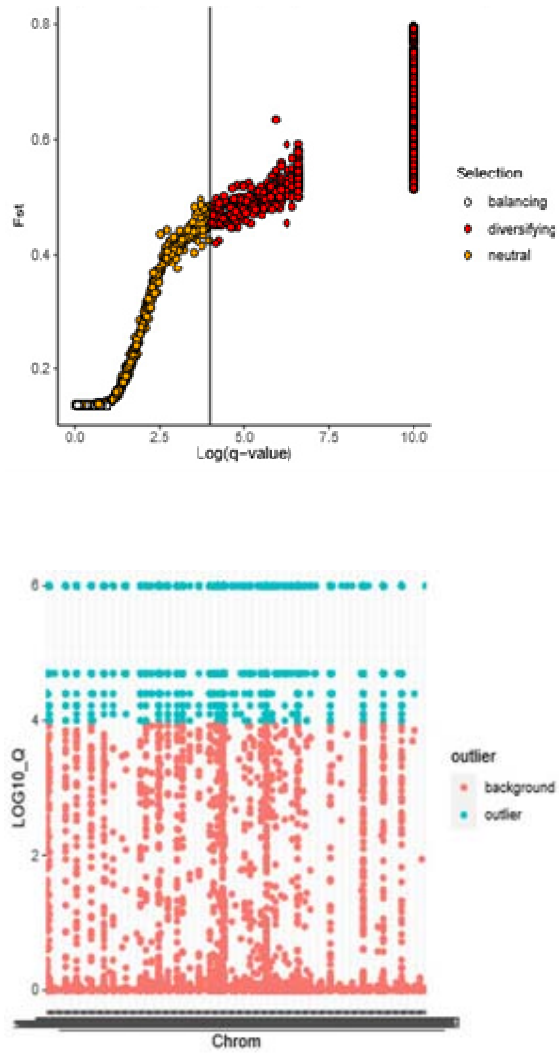



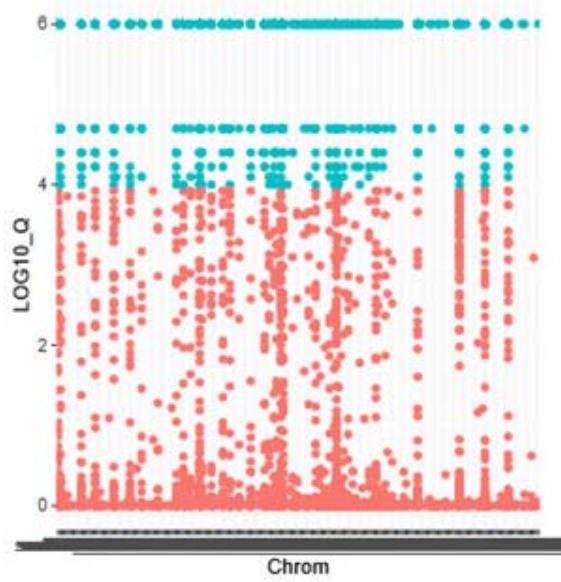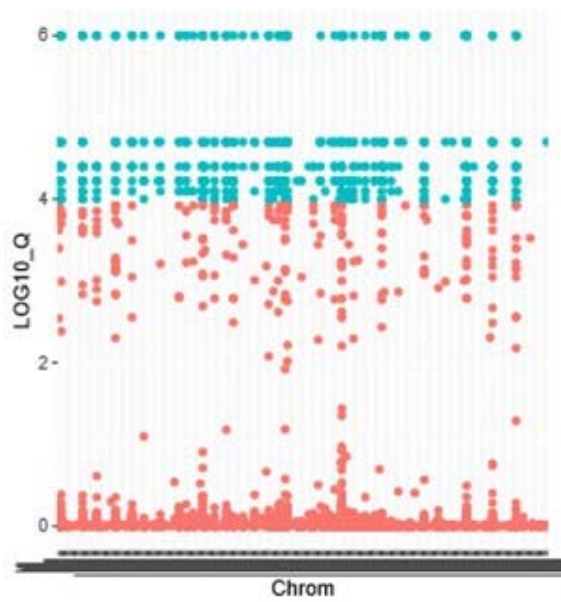

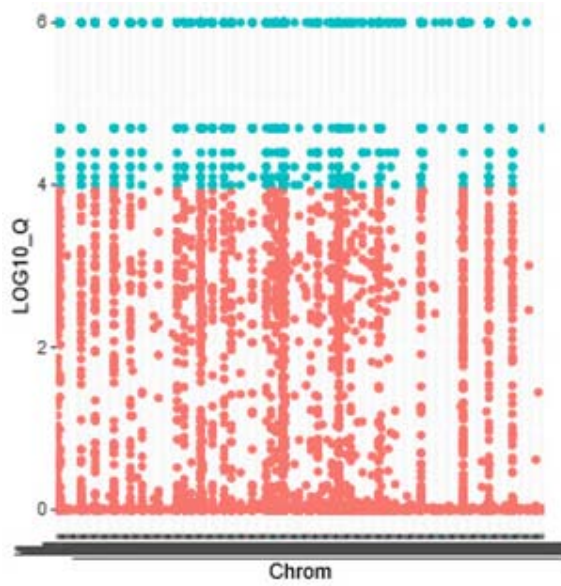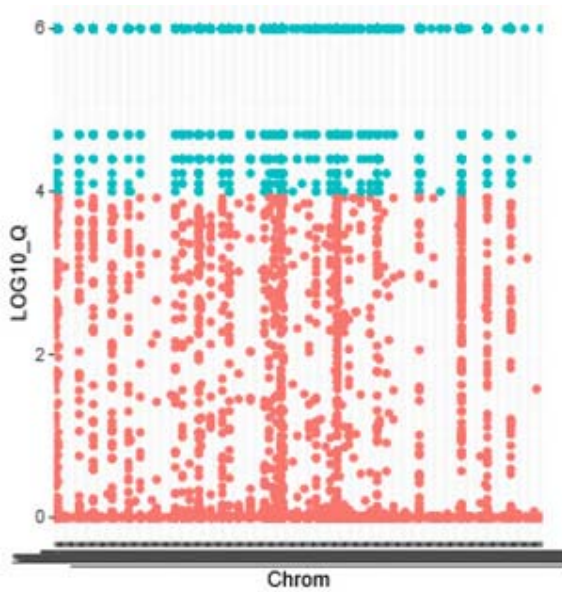

Figure 6

| <b>Mantel Test</b> |            |                |
|--------------------|------------|----------------|
| <b>X-axis</b>      | <b>Rxy</b> | <b>P_Value</b> |
| <b>Dist</b>        | 0.547      | 0.0001         |
| <b>Prec</b>        | 0.197      | 0.0002         |
| <b>PS</b>          | 0.184      | 0.0003         |
| <b>Temp</b>        | 0.402      | 0.0001         |
| <b>TS</b>          | 0.233      | 0.0001         |
| <b>Alt</b>         | 0.206      | 0.0001         |

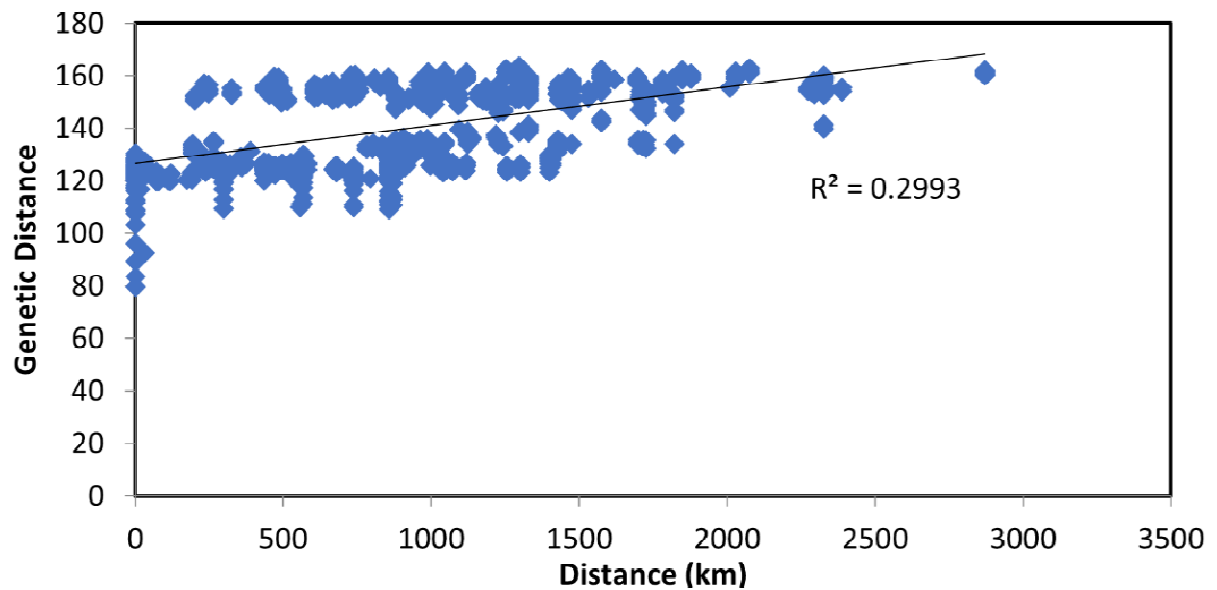

Figure 7

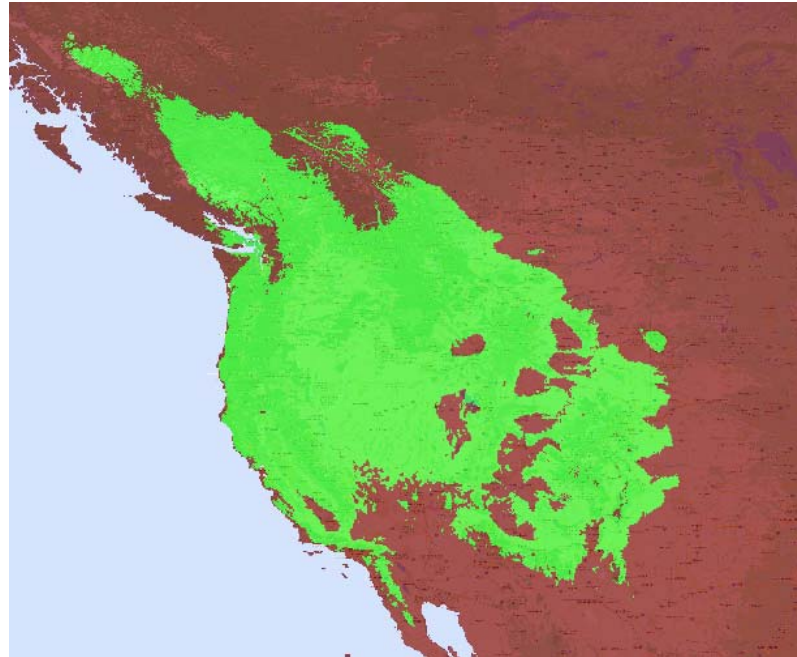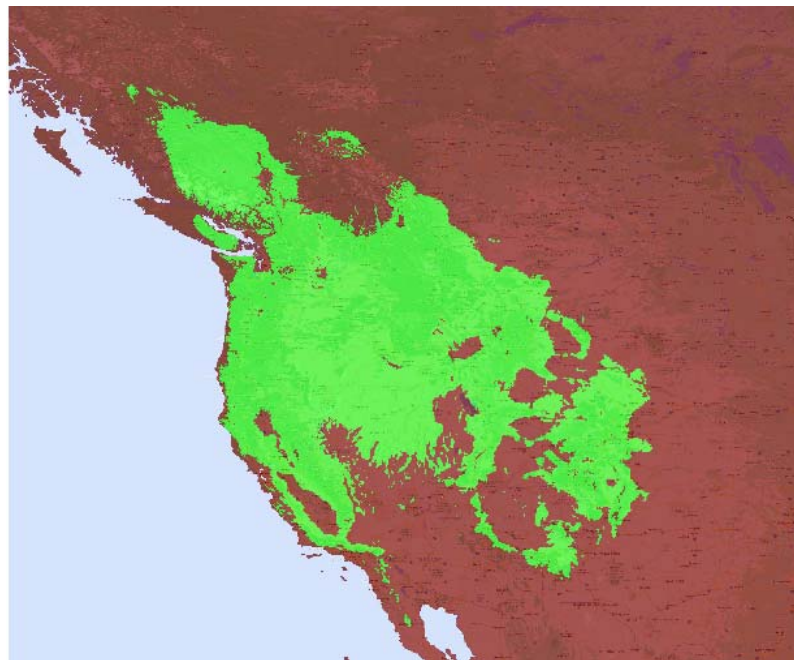

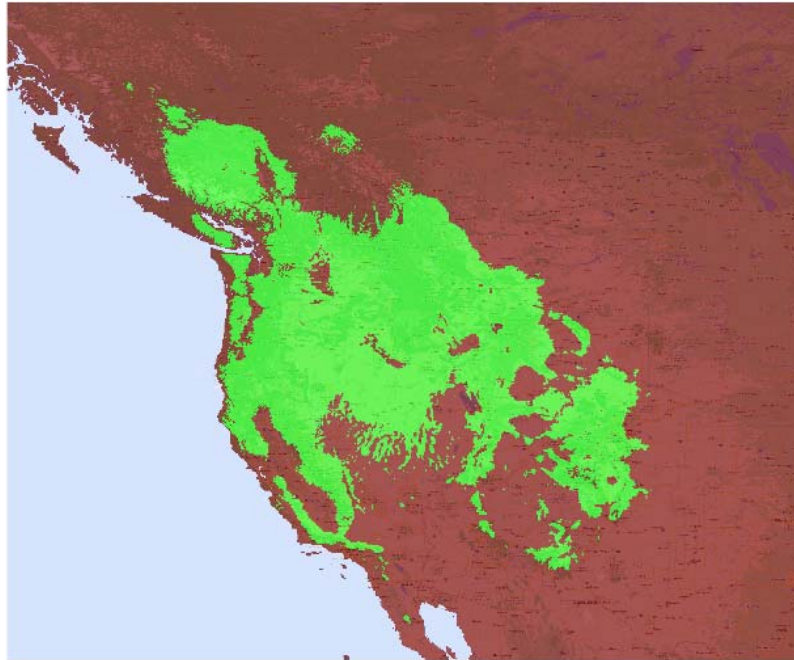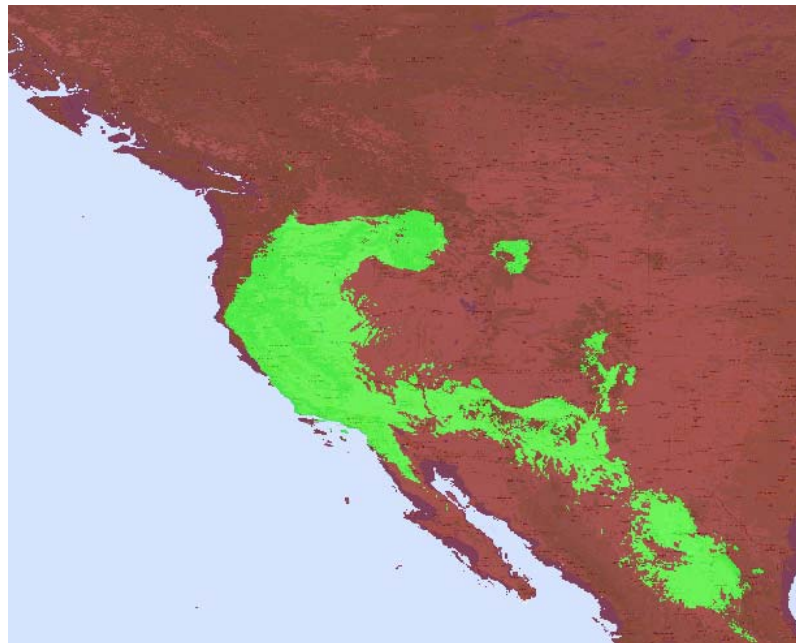

Source: https://www.biorxiv.org/content/10.1101/2023.02.25.529994v2.full.pdf
